# Supplementary material for: Fabrication and Optimization of 3D-Printed Silica Scaffolds for Neural Precursor Cell Cultivation
Source: MDPI journal article supplement (doi:10.3390/jfb14090465), 2023-09-09
Supplement: s1 [file s1]

Supplementary Material of

Article

Fabrication and Optimization of 3D-Printed Silica Scaffolds for Neural Precursor Cell Cultivation

Georgia Kastrinaki <sup>1,\*</sup>, Eleftheria-Maria Pechlivani <sup>2,†</sup>, Ioannis Gkekas <sup>3,†</sup>, Nikolaos Kladovasilakis <sup>2</sup>, Evdokia Gkagkari <sup>1</sup>, Spyros Petrakis <sup>3</sup> and Akrivi Asimakopoulou <sup>1</sup>

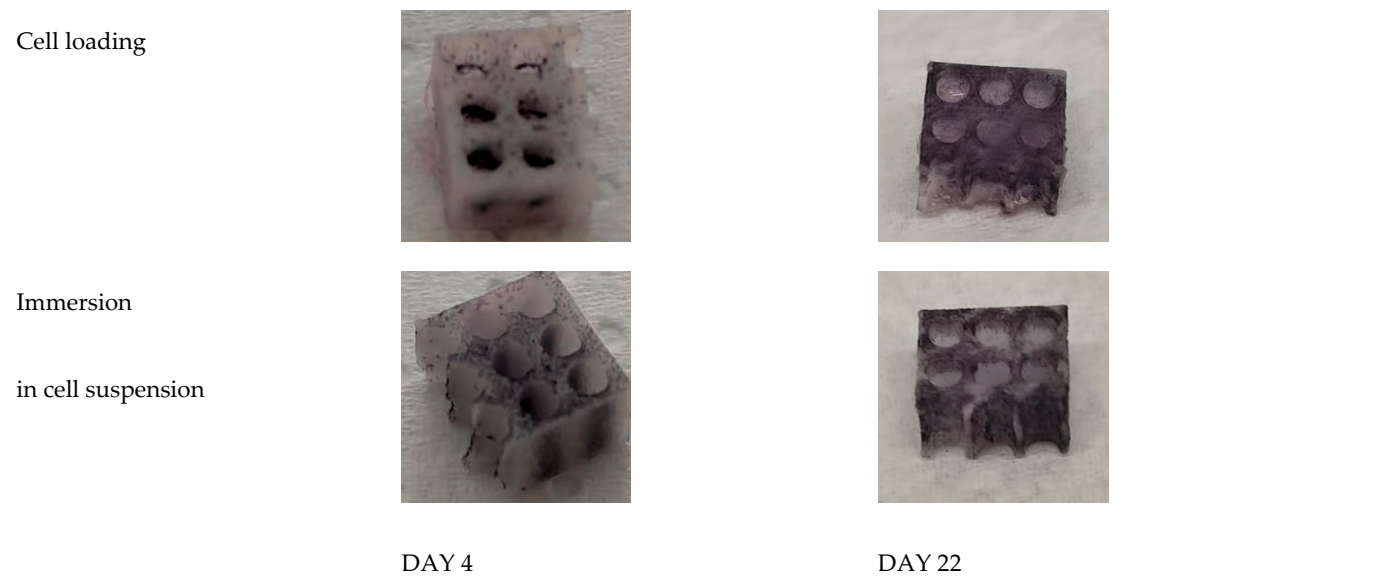

Figure S1. NPC-laden ceramic scaffolds by cell loading and by immersion in cell suspension (pore size: 2mm, wall thickness: 0.5mm) at day 4 and day 22

| Wall thickness (mm) | Non calcined (mm) |      |      | Slow calcined (mm) |      |      | Fast calcined (mm) |      |      | Reduction of calcined |      |      |                   |       |       |
|---------------------|-------------------|------|------|--------------------|------|------|--------------------|------|------|-----------------------|------|------|-------------------|-------|-------|
|                     |                   |      |      |                    |      |      |                    |      |      | Slow calcined (%)     |      |      | Fast calcined (%) |       |       |
| -                   | x                 | y    | z    | x                  | y    | z    | x                  | y    | z    | x                     | y    | z    | x                 | y     | z     |
| 0.5                 | 22.8              | 22.3 | 28.6 | 19.3               | 18.6 | ~*   | 19.0               | 19.2 | ~*   | 15.2                  | 16.1 | -    | 16.50             | 13.54 |       |
| 1                   | 19.8              | 19.8 | 23.1 | 18.1               | 17.9 | 19.5 | 18.2               | 18.5 | 20.1 | 8.7                   | 9.6  | 15.2 | 8.17              | 6.49  | 12.64 |
| 2                   | 19.9              | 19.9 | 23.1 | 18.9               | 18.4 | 20.7 | 18.6               | 18.8 | 21.3 | 5.2                   | 7.7  | 10.3 | 6.47              | 5.51  | 7.61  |
| 4                   | 19.8              | 19.8 | 22.9 | 18.2               | 18.1 | 20.7 | 18.4               | 18.4 | 20.7 | 8.2                   | 8.5  | 9.4  | 6.96              | 7.00  | 9.68  |

Table S1. Dimensions of the cubic samples with different wall thickness non calcined and under Slow and Fast calcination profiles and respective % reduction
